# Supplementary material
Source: Springer Nature journal article supplement (https://www.springermedizin.de/resource/supplementary/12889_2011_4911_MOESM3_ESM.pdf/9491572)

**(a)**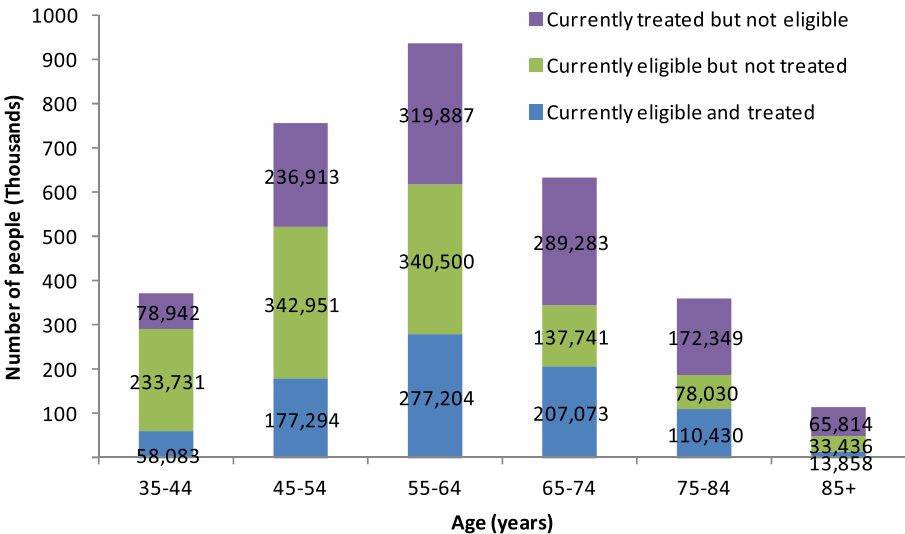**(b)**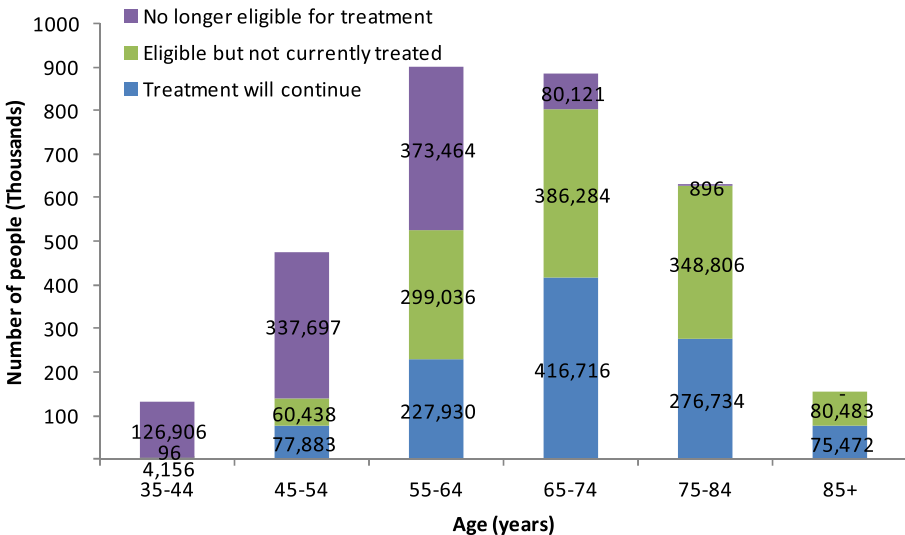

Supplement: MOESM3 [file 9491572]
